# Supplementary material for: Mouse V1 population correlates of visual detection rely on heterogeneity within neuronal response patterns
Source: eLife journal article supplement (doi:10.7554/elife.10163), 2015-12-08

## Single animal examples

## Mean over all animals (n=8)

Mean dF/F<sub>0</sub>

Heterogeneity

Mean dF/F<sub>0</sub>

Heterogeneity

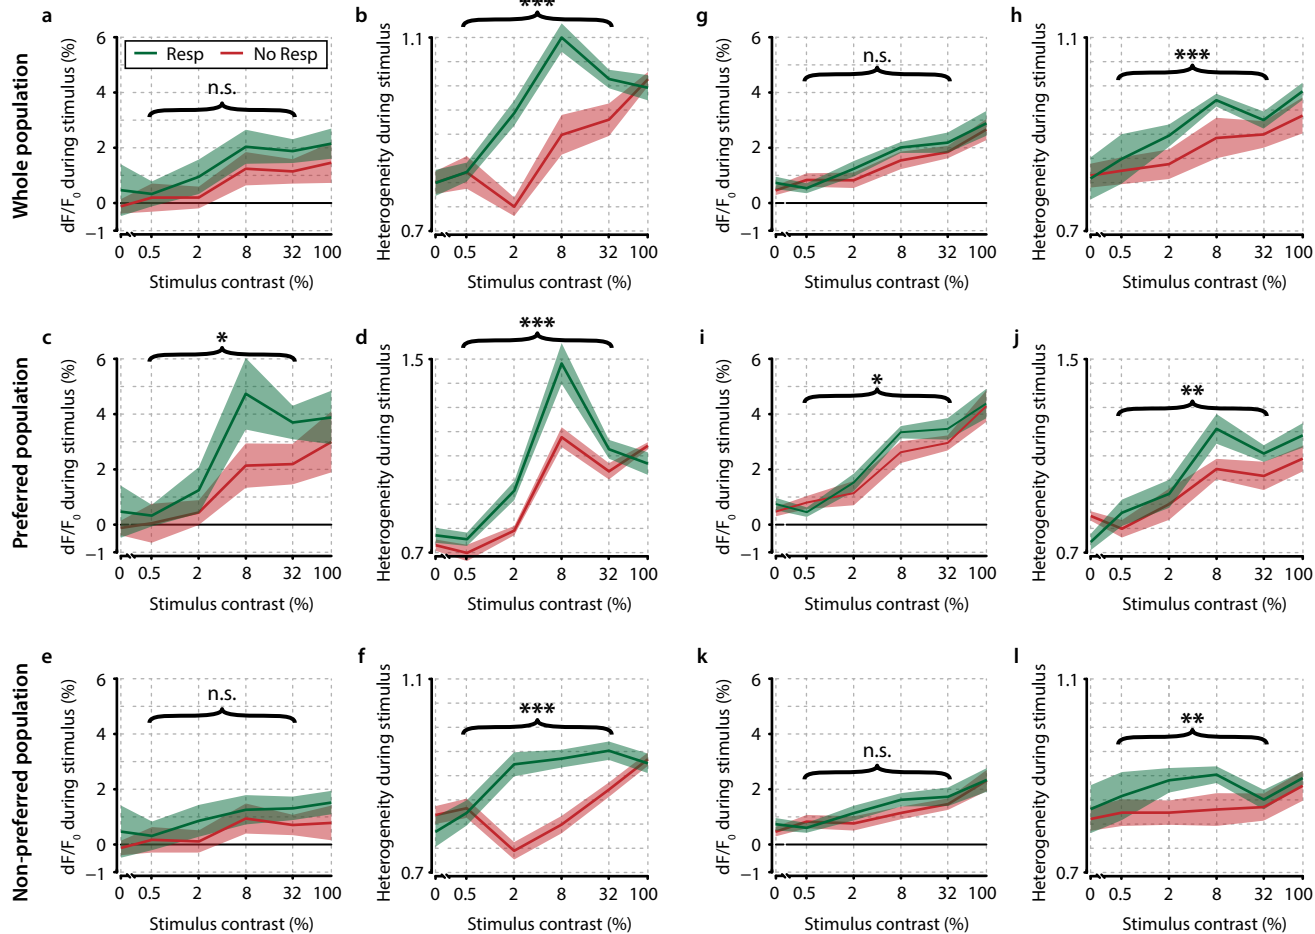

Supplement: supp [file elife-10163-supp-v1.zip]
