# Supplementary figures and images for: Mouse V1 population correlates of visual detection rely on heterogeneity within neuronal response patterns
Source: eLife journal article supplement (doi:10.7554/elife.10163), 2015-12-08

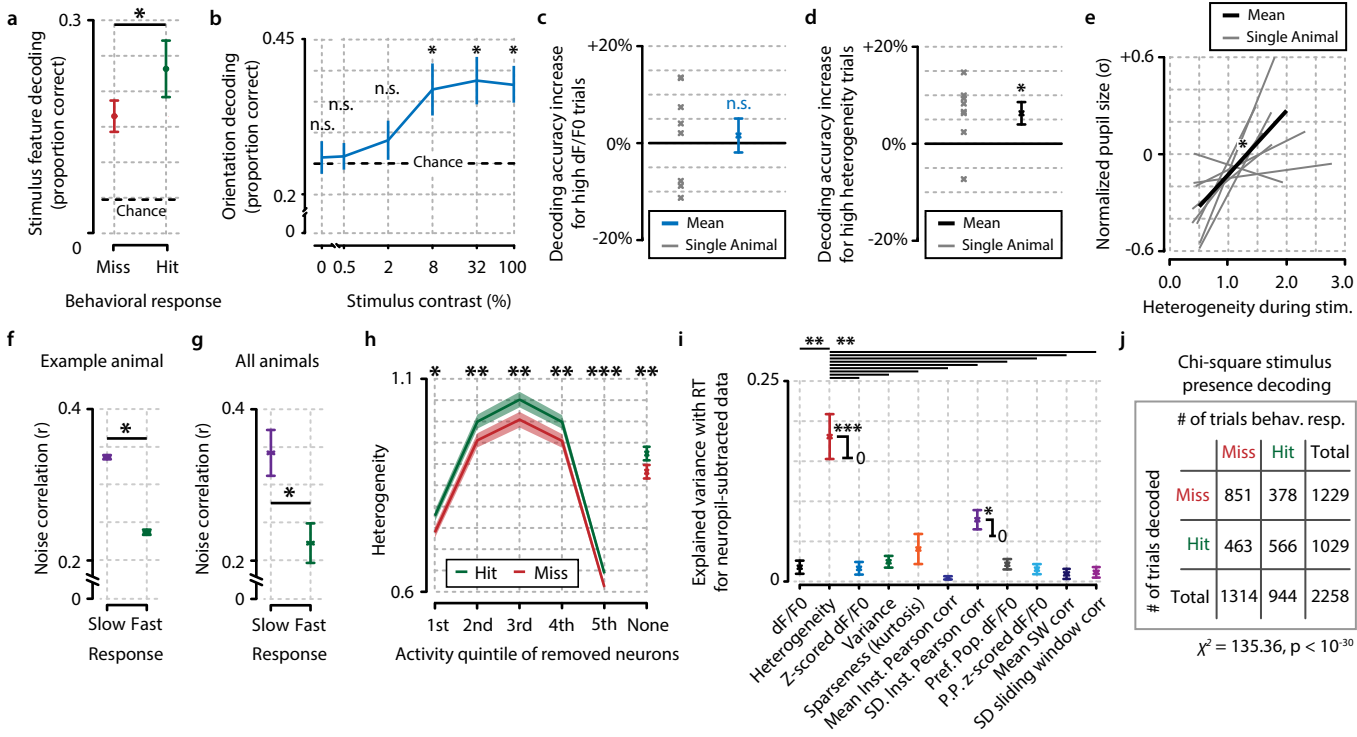

Supplement: supp [file elife-10163-supp-v1.zip]

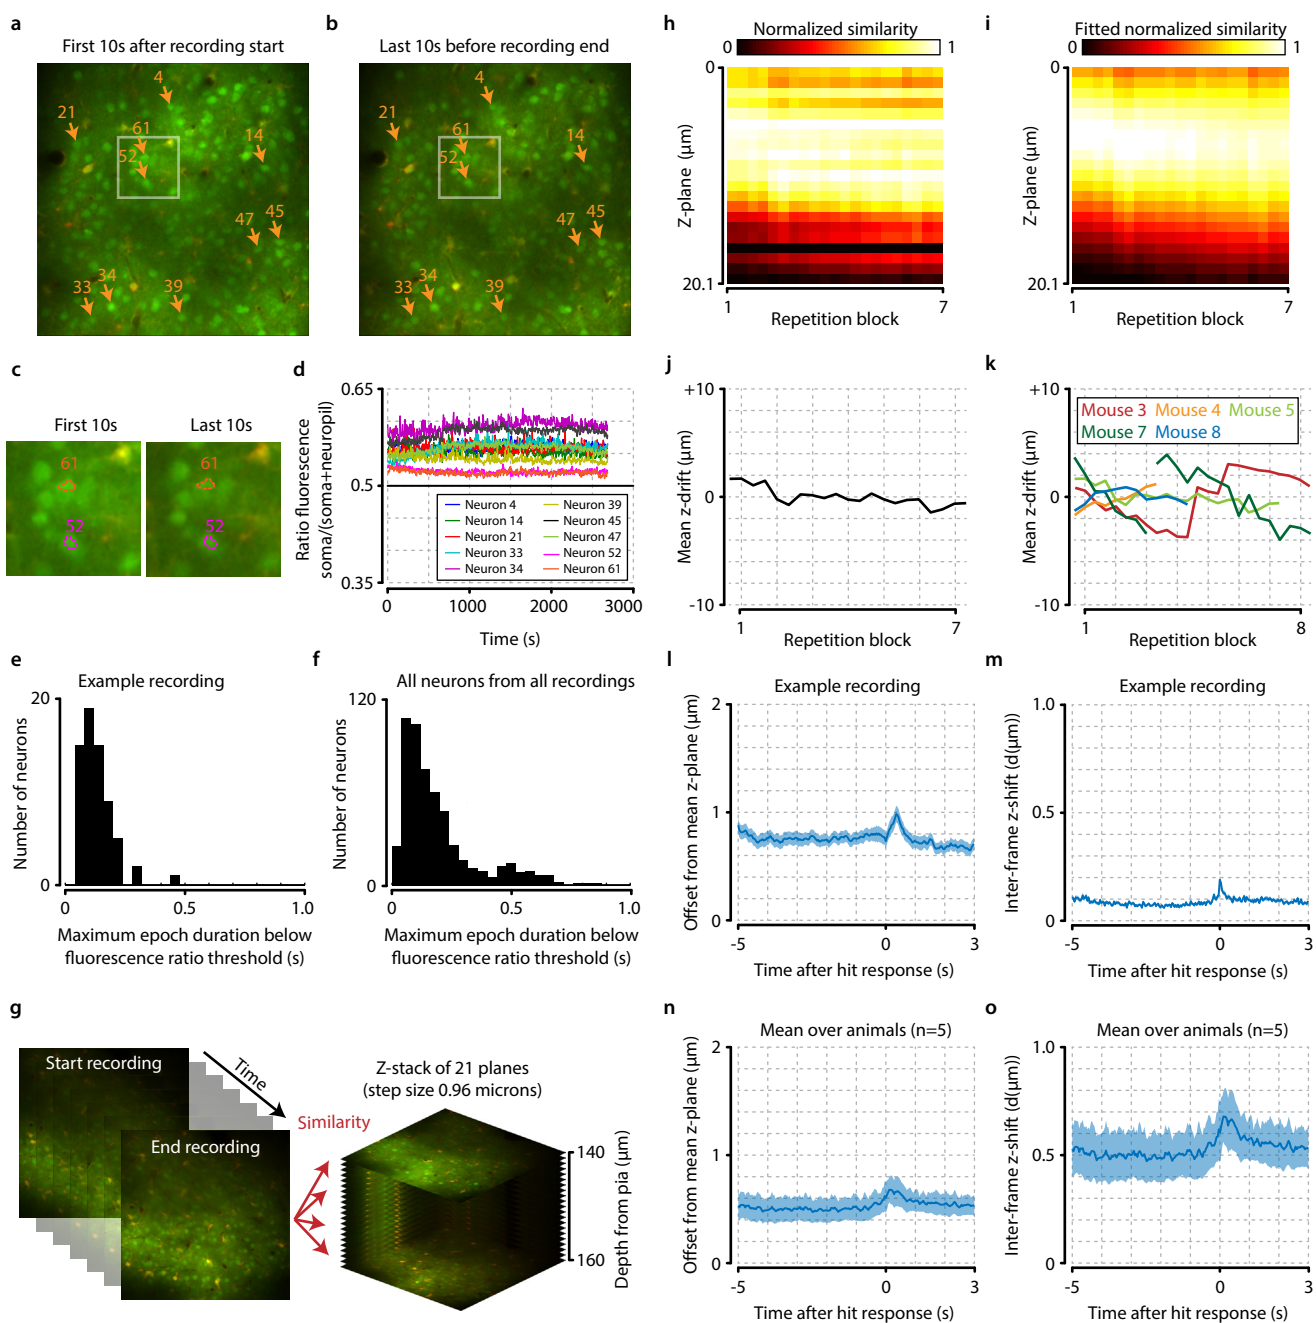

Supplement: supp [file elife-10163-supp-v1.zip]

Single animal examples

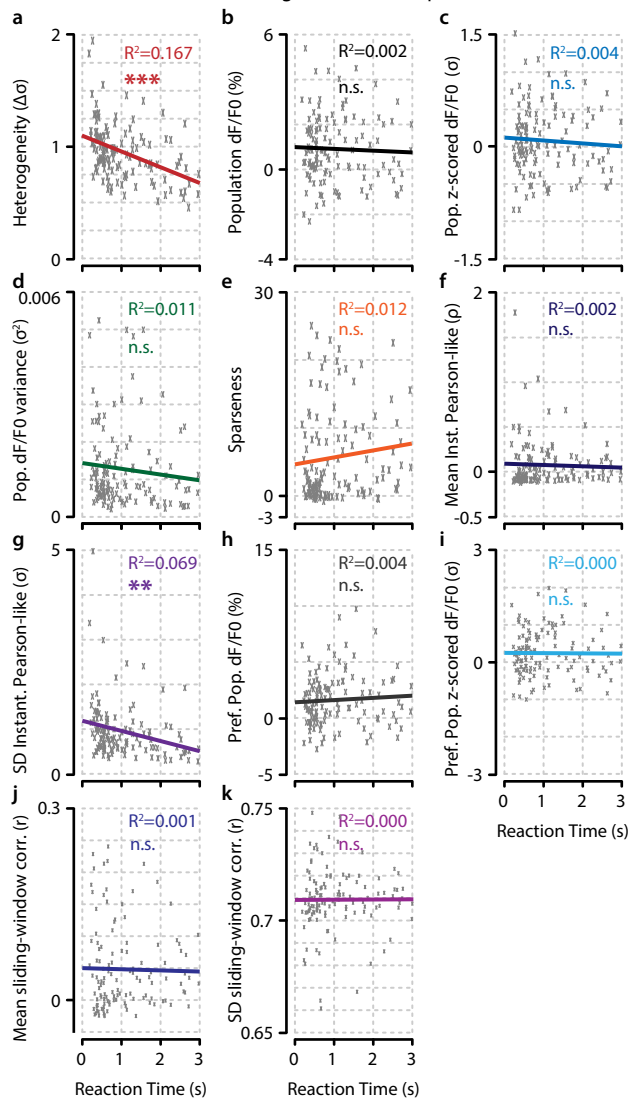

Mean over all animals (n=8)

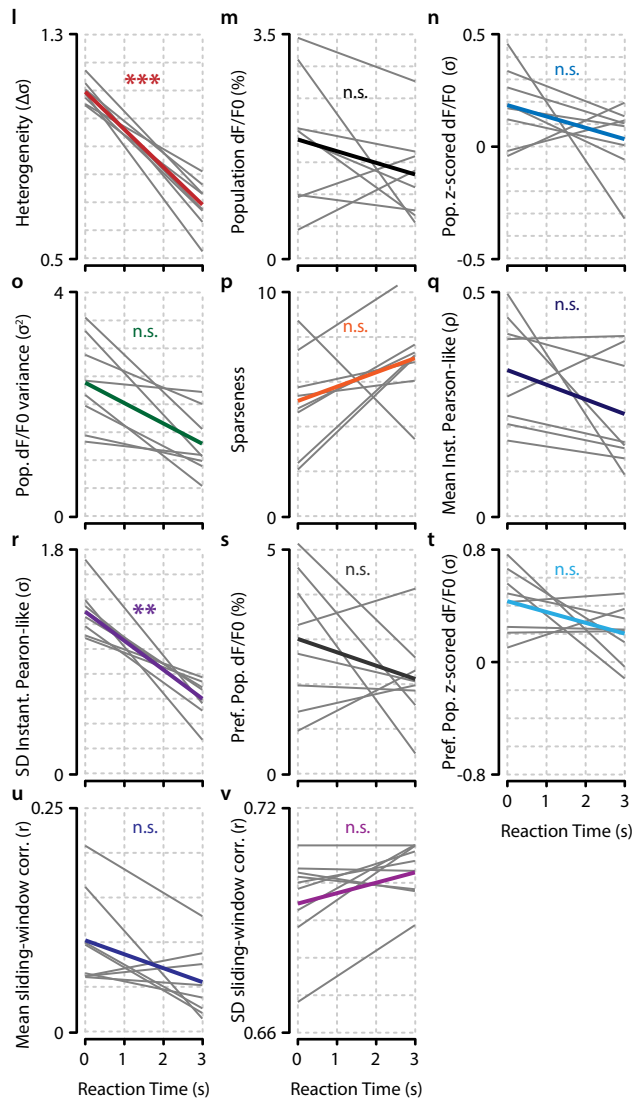

Supplement: supp [file elife-10163-supp-v1.zip]

**a**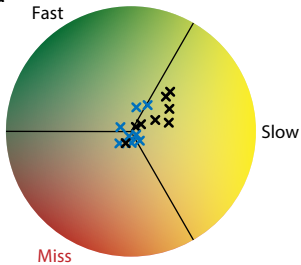**b**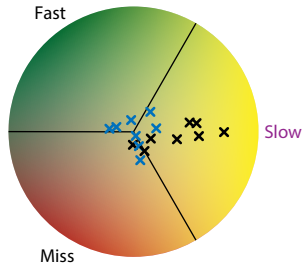**c**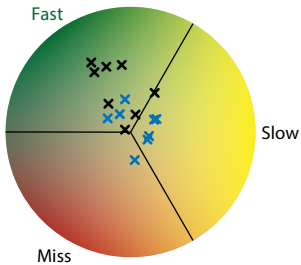**d**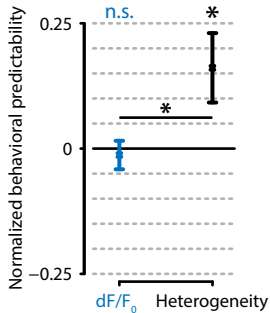

Supplement: supp [file elife-10163-supp-v1.zip]

# Paired t-tests vs. heterogeneity:

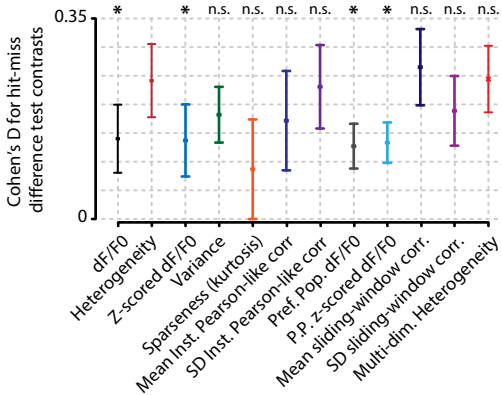

Supplement: supp [file elife-10163-supp-v1.zip]

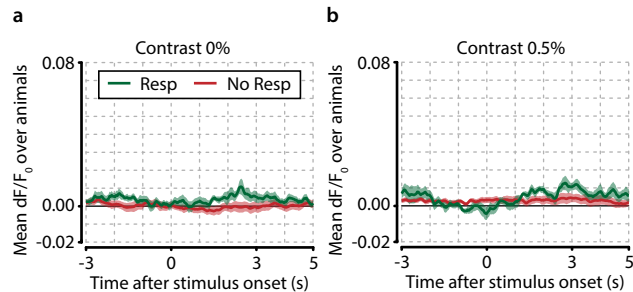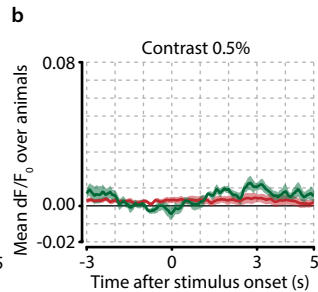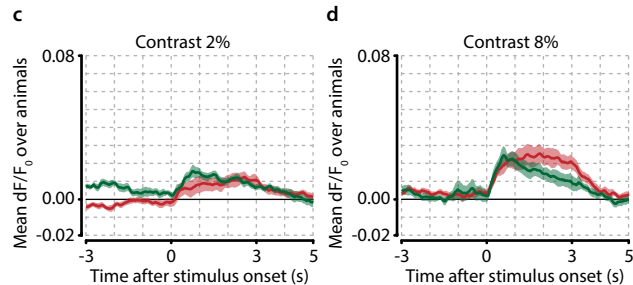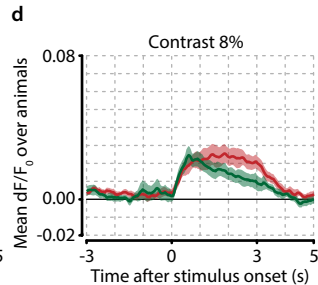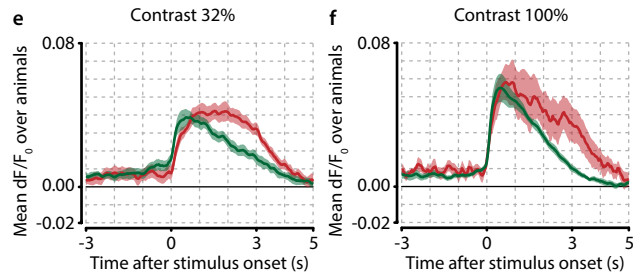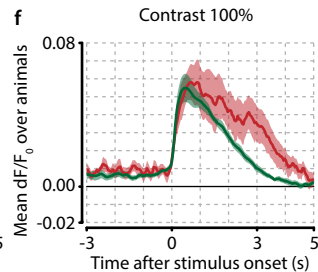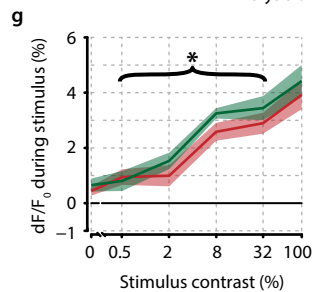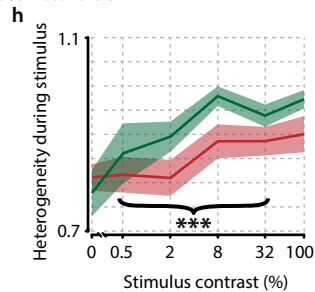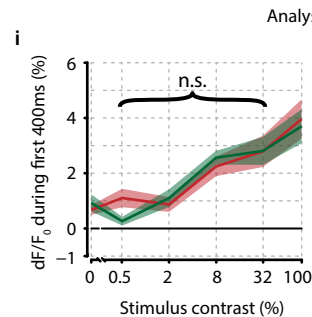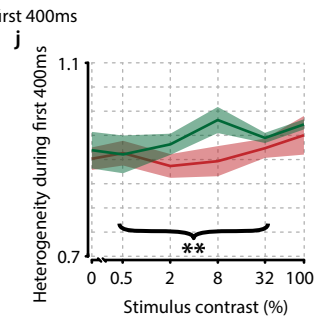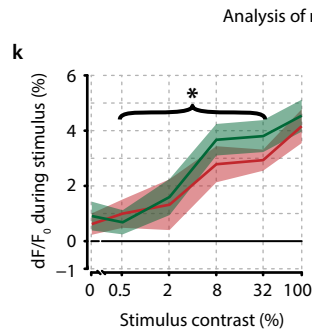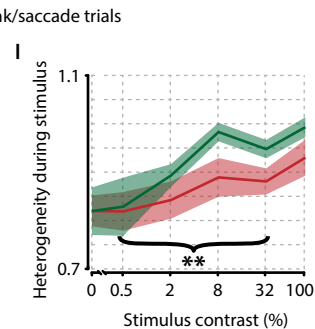

Supplement: supp [file elife-10163-supp-v1.zip]
